# Supplementary material
Source: publisher figshare collection journal article supplement (https://tandf.figshare.com/ndownloader/files/21196296)
Supplement: Supplementary file 1 [file 21196296]

**Electronic supplementary material (ESM)**

Table 1. KMO and Barlett’s Test

| **KMO and Bartlett's Test** | | |
| --- | --- | --- |
| Kaiser-Meyer-Olkin Measure of Sampling Adequacy. | | .981 |
| Bartlett's Test of Sphericity | Approx. Chi-Square | 444186.614 |
| Df | 2628 |
| Sig. | .000 |

Table 2. Total variance explained

| **Total Variance Explained** | | | | | | | |
| --- | --- | --- | --- | --- | --- | --- | --- |
| Component | Initial Eigenvalues | | | Extraction Sums of Squared Loadings | | | Rotation Sums of Squared Loadingsa |
| Total | % of Variance | Cumulative % | Total | % of Variance | Cumulative % | Total |
| 1 | 61.970 | 84.890 | 84.890 | 61.970 | 84.890 | 84.890 | 57.810 |
| 2 | 4.188 | 5.737 | 90.627 | 4.188 | 5.737 | 90.627 | 45.511 |
| 3 | 1.851 | 2.536 | 93.163 | 1.851 | 2.536 | 93.163 | 44.049 |
| 4 | .668 | .915 | 94.078 |  |  |  |  |
| 5 | .547 | .749 | 94.827 |  |  |  |  |
| 6 | .355 | .486 | 95.313 |  |  |  |  |
| 7 | .336 | .461 | 95.774 |  |  |  |  |
| 8 | .302 | .413 | 96.187 |  |  |  |  |
| 9 | .228 | .313 | 96.500 |  |  |  |  |
| 10 | .201 | .276 | 96.775 |  |  |  |  |
| 11 | .178 | .243 | 97.019 |  |  |  |  |
| 12 | .169 | .231 | 97.250 |  |  |  |  |
| 13 | .155 | .213 | 97.463 |  |  |  |  |
| 14 | .148 | .203 | 97.665 |  |  |  |  |
| 15 | .128 | .175 | 97.840 |  |  |  |  |
| 16 | .123 | .169 | 98.009 |  |  |  |  |
| 17 | .120 | .164 | 98.173 |  |  |  |  |
| 18 | .108 | .147 | 98.321 |  |  |  |  |
| 19 | .096 | .132 | 98.452 |  |  |  |  |
| 20 | .088 | .120 | 98.573 |  |  |  |  |
| 21 | .079 | .108 | 98.680 |  |  |  |  |
| 22 | .077 | .105 | 98.786 |  |  |  |  |
| 23 | .072 | .098 | 98.884 |  |  |  |  |
| 24 | .065 | .089 | 98.973 |  |  |  |  |
| 25 | .061 | .083 | 99.056 |  |  |  |  |
| 26 | .058 | .080 | 99.136 |  |  |  |  |
| 27 | .054 | .074 | 99.210 |  |  |  |  |
| 28 | .052 | .071 | 99.281 |  |  |  |  |
| 29 | .046 | .063 | 99.344 |  |  |  |  |
| 30 | .043 | .058 | 99.403 |  |  |  |  |
| 31 | .036 | .050 | 99.452 |  |  |  |  |
| 32 | .035 | .048 | 99.500 |  |  |  |  |
| 33 | .032 | .044 | 99.544 |  |  |  |  |
| 34 | .028 | .038 | 99.582 |  |  |  |  |
| 35 | .027 | .037 | 99.619 |  |  |  |  |
| 36 | .024 | .033 | 99.652 |  |  |  |  |
| 37 | .021 | .029 | 99.681 |  |  |  |  |
| 38 | .021 | .028 | 99.709 |  |  |  |  |
| 39 | .018 | .025 | 99.734 |  |  |  |  |
| 40 | .016 | .022 | 99.756 |  |  |  |  |
| 41 | .015 | .020 | 99.777 |  |  |  |  |
| 42 | .014 | .020 | 99.796 |  |  |  |  |
| 43 | .014 | .019 | 99.815 |  |  |  |  |
| 44 | .012 | .017 | 99.832 |  |  |  |  |
| 45 | .011 | .015 | 99.847 |  |  |  |  |
| 46 | .009 | .013 | 99.860 |  |  |  |  |
| 47 | .009 | .012 | 99.872 |  |  |  |  |
| 48 | .009 | .012 | 99.884 |  |  |  |  |
| 49 | .008 | .011 | 99.894 |  |  |  |  |
| 50 | .007 | .010 | 99.905 |  |  |  |  |
| 51 | .007 | .010 | 99.914 |  |  |  |  |
| 52 | .007 | .009 | 99.924 |  |  |  |  |
| 53 | .006 | .008 | 99.931 |  |  |  |  |
| 54 | .005 | .007 | 99.939 |  |  |  |  |
| 55 | .005 | .007 | 99.946 |  |  |  |  |
| 56 | .004 | .006 | 99.952 |  |  |  |  |
| 57 | .004 | .006 | 99.957 |  |  |  |  |
| 58 | .004 | .005 | 99.962 |  |  |  |  |
| 59 | .003 | .005 | 99.967 |  |  |  |  |
| 60 | .003 | .004 | 99.971 |  |  |  |  |
| 61 | .003 | .004 | 99.975 |  |  |  |  |
| 62 | .002 | .003 | 99.979 |  |  |  |  |
| 63 | .002 | .003 | 99.982 |  |  |  |  |
| 64 | .002 | .003 | 99.985 |  |  |  |  |
| 65 | .002 | .003 | 99.987 |  |  |  |  |
| 66 | .002 | .002 | 99.990 |  |  |  |  |
| 67 | .002 | .002 | 99.992 |  |  |  |  |
| 68 | .001 | .002 | 99.994 |  |  |  |  |
| 69 | .001 | .002 | 99.995 |  |  |  |  |
| 70 | .001 | .001 | 99.997 |  |  |  |  |
| 71 | .001 | .001 | 99.998 |  |  |  |  |
| 72 | .001 | .001 | 99.999 |  |  |  |  |
| 73 | .001 | .001 | 100.000 |  |  |  |  |
| Extraction Method: Principal Component Analysis. | | | | | | | |
| 1. When components are correlated, sums of squared loadings cannot be added to obtain a total variance. | | | | | | | |

Table 3. Similarity limit

| **Descriptive Statistics** | | | |
| --- | --- | --- | --- |
|  | Mean | Std. Deviation | N |
| N1as1 | .2594 | .30434 | 1666 |
| N1as2 | .2602 | .30591 | 1666 |
| N1as3 | .2672 | .29991 | 1666 |
| N10as1 | .2595 | .21607 | 1666 |
| N10as2 | .2764 | .31709 | 1666 |
| N10as3 | .3094 | .32118 | 1666 |
| N13as1 | .2574 | .29171 | 1666 |
| N13as2 | .4774 | .33031 | 1666 |
| N13as3 | .2924 | .30609 | 1666 |
| N13bs1 | .2992 | .27506 | 1666 |
| N13bs2 | .2785 | .28733 | 1666 |
| N13bs3 | .3036 | .26289 | 1666 |
| N14as1 | .2676 | .21767 | 1666 |
| N14as2 | .2154 | .20229 | 1666 |
| N14as3 | .3287 | .23422 | 1666 |
| N18as1 | .2760 | .35935 | 1666 |
| N18as2 | .3439 | .34211 | 1666 |
| N18as3 | .2928 | .31014 | 1666 |
| N19as1 | .2519 | .26420 | 1666 |
| N19as2 | .2383 | .29731 | 1666 |
| N19as3 | .2789 | .30667 | 1666 |


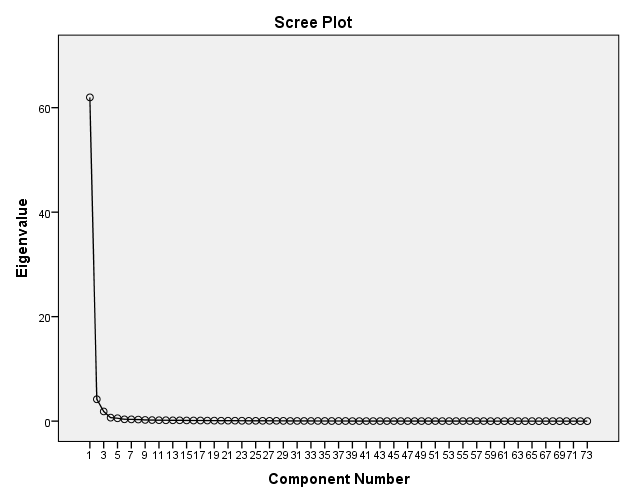


Fig.1 Scree plot
